# Supplementary material for: Identification of SPOP related metabolic pathways in prostate cancer
Source: PubMed Central journal article supplement (PMC5732708; doi:10.18632/oncotarget.21460), 2017-10-03
Supplement: oncotarget-08-103032-s001.pdf [file oncotarget-08-103032-s001.pdf]

## Identification of *SPOP* related metabolic pathways in prostate cancer

### SUPPLEMENTARY MATERIALS

**Supplementary Table 1: Differential metabolites were listed with *P* values, fold changes and metabolic pathways in *SPOP*-mutated cohort**

| Metabolites                        | <i>P</i> value | Fold change (T/N) | Platform   | Pathways                                                |
|------------------------------------|----------------|-------------------|------------|---------------------------------------------------------|
| N-Acetyl-D-mannosamine             | 0.03           | 2.68              | GC-MS      | Amino sugar and nucleotide sugar metabolism             |
| N-Acetyl-D-Glucosamine 6-Phosphate | 0.03           | 2.53              | LC-MS      | Amino sugar and nucleotide sugar metabolism             |
| Carnitine C8:0                     | 0.01           | 0.32              | LC-MS      | Beta Oxidation of Very Long Chain Fatty Acids           |
| GCDCA                              | 0.01           | 0.55              | LC-MS      | Bile acid biosynthesis                                  |
| Ne,Ne,Ne-Trimethyl-lysine          | 0.03           | 2.53              | LC-MS      | Carnitine Synthesis                                     |
| FFA 20:2                           | 0.03           | 3.32              | LC-MS      | Fatty acid metabolism                                   |
| FFA 22:2                           | 0.02           | 2.86              | LC-MS      | Fatty acid metabolism                                   |
| FFA 20:1                           | 0.03           | 2.50              | LC-MS      | Fatty acid metabolism                                   |
| FFA 20:3                           | 0.03           | 2.42              | LC-MS      | Fatty acid metabolism                                   |
| FFA 22:3                           | 0.01           | 2.39              | LC-MS      | Fatty acid metabolism                                   |
| FFA 22:0                           | 0.02           | 2.05              | LC-MS      | Fatty acid metabolism                                   |
| FFA 19:0                           | 0.03           | 1.91              | LC-MS      | Fatty acid metabolism                                   |
| FFA 20:0                           | 0.03           | 1.89              | LC-MS      | Fatty acid metabolism                                   |
| Cis-5,8,11-Eicosatrienoic acid     | 0.03           | 1.83              | GC-MS      | Fatty acid metabolism                                   |
| FFA 22:4                           | 0.03           | 1.79              | LC-MS      | Fatty acid metabolism                                   |
| Oleic acid                         | 0.03           | 1.60              | GC-MS      | Fatty acid metabolism                                   |
| Hexadecanoic acid                  | 0.03           | 1.54              | GC-MS      | Fatty acid metabolism                                   |
| Pyroglutamic acid                  | 0.03           | 1.57              | GC-MS      | Glutathione metabolism                                  |
| TAG 55:1                           | 0.03           | 6.09              | Lipidomics | Glycerolipid metabolism                                 |
| TAG 56:1                           | 0.03           | 4.03              | Lipidomics | Glycerolipid metabolism                                 |
| TAG 58:1                           | 0.03           | 3.54              | Lipidomics | Glycerolipid metabolism                                 |
| TAG 54:0                           | 0.02           | 3.11              | Lipidomics | Glycerolipid metabolism                                 |
| TAG 52:0                           | 0.02           | 3.02              | Lipidomics | Glycerolipid metabolism                                 |
| TAG 51:0                           | 0.03           | 2.74              | Lipidomics | Glycerolipid metabolism                                 |
| TAG 56:0                           | 0.02           | 2.38              | Lipidomics | Glycerolipid metabolism                                 |
| TAG 50:0                           | 0.03           | 2.15              | Lipidomics | Glycerolipid metabolism                                 |
| PC 28:0                            | 0.03           | 4.42              | LC-MS      | Glycerophospholipid metabolism                          |
| Choline glycerophosphate           | 0.03           | 4.37              | LC-MS      | Glycerophospholipid metabolism                          |
| PE O-36:4                          | 0.03           | 4.24              | Lipidomics | Glycerophospholipid metabolism                          |
| Glycerolphosphorylethanolamine     | 0.03           | 4.13              | LC-MS      | Glycerophospholipid metabolism                          |
| PC 37:1                            | 0.03           | 3.66              | Lipidomics | Glycerophospholipid metabolism                          |
| PC 35:1                            | 0.03           | 3.51              | Lipidomics | Glycerophospholipid metabolism                          |
| PC 33:1                            | 0.03           | 2.38              | Lipidomics | Glycerophospholipid metabolism                          |
| PE 35:1                            | 0.02           | 2.19              | Lipidomics | Glycerophospholipid metabolism                          |
| PE 33:1                            | 0.03           | 1.86              | Lipidomics | Glycerophospholipid metabolism                          |
| DAG 38:2                           | 0.02           | 3.59              | Lipidomics | Glycerophospholipid metabolism, Glycerolipid metabolism |
| DAG 36:3                           | 0.02           | 2.11              | Lipidomics | Glycerophospholipid metabolism, Glycerolipid metabolism |
| DAG 36:2                           | 0.03           | 1.96              | Lipidomics | Glycerophospholipid metabolism, Glycerolipid metabolism |
| DAG 34:2                           | 0.01           | 1.71              | Lipidomics | Glycerophospholipid metabolism, Glycerolipid metabolism |
| Histamine                          | 0.03           | 0.44              | LC-MS      | Histidine metabolism                                    |
| Glycerol-2-phosphate               | 0.03           | 2.23              | GC-MS      | Lipids metabolism                                       |
| Glycerol 3-phosphate               | 0.03           | 2.02              | LC-MS      | Lipids metabolism                                       |
| Arabinitol                         | 0.01           | 1.86              | GC-MS      | Pentose and glucuronate interconversions                |
| Cer 38:2;2                         | 0.03           | 6.37              | Lipidomics | Sphingolipid metabolism                                 |
| Cer 34:2;2                         | 0.02           | 3.58              | Lipidomics | Sphingolipid metabolism                                 |
| Cer 40:2;2                         | 0.02           | 3.51              | Lipidomics | Sphingolipid metabolism                                 |
| CE 24:5                            | 0.02           | 21.79             | Lipidomics | Steroid biosynthesis                                    |
| CE 20:1                            | 0.03           | 11.02             | Lipidomics | Steroid biosynthesis                                    |
| Fumaric acid                       | 0.02           | 2.51              | LC-MS      | TCA cycle                                               |
| Malic acid                         | 0.03           | 2.14              | GC-MS      | TCA cycle                                               |
| Nicotinamide adenine dinucleotide  | 0.02           | 27.38             | LC-MS      | TCA cycle, Glycolysis                                   |

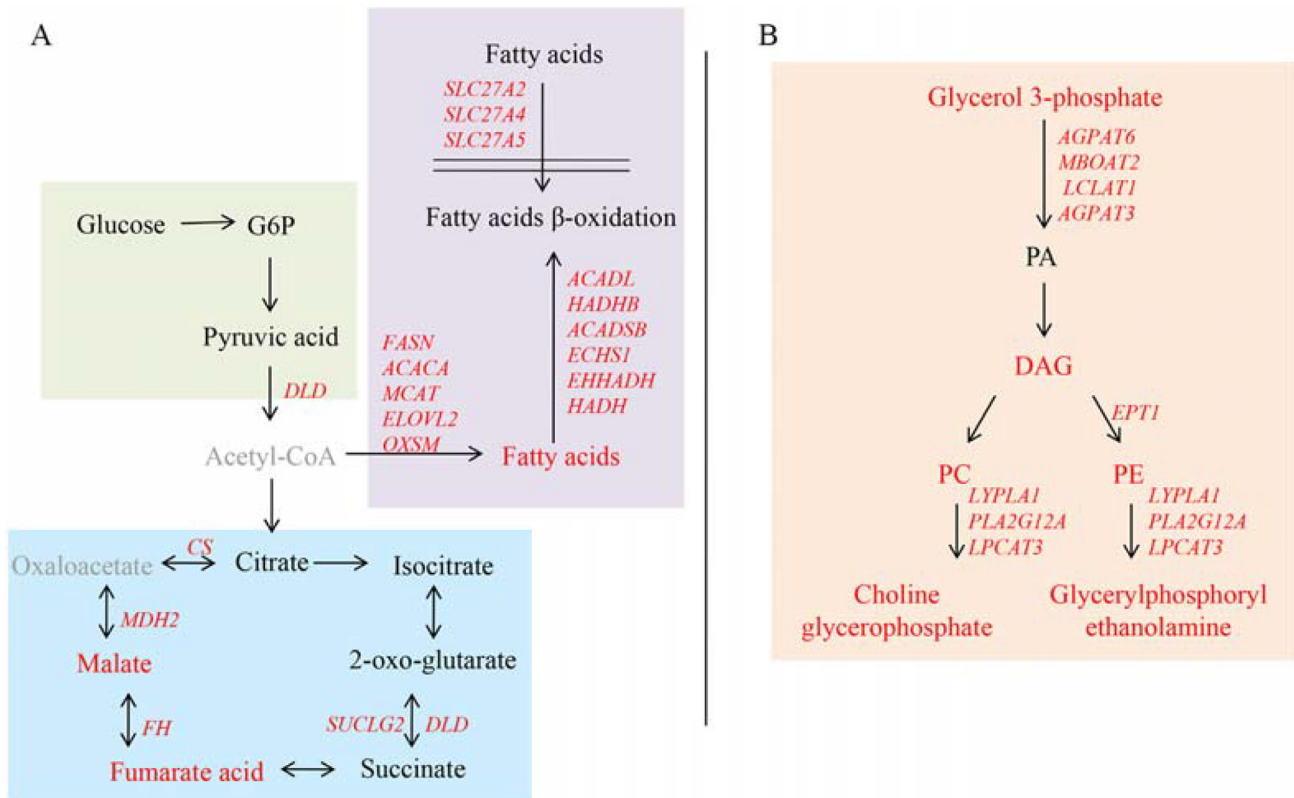

**Supplementary Figure 1: Overall alterations of metabolic pathways in *SPOP*-mutated PCa patients.** (A) Glycolysis metabolic pathway, TCA cycle pathway and fatty acids metabolic pathway are presented. (B) Glycerophospholipid metabolic pathway is shown. Black, Red, and grey fonts represent non-altered, significantly upregulated and non-detected metabolites and transcripts, respectively. The transcripts are labeled by *Italic* fonts.

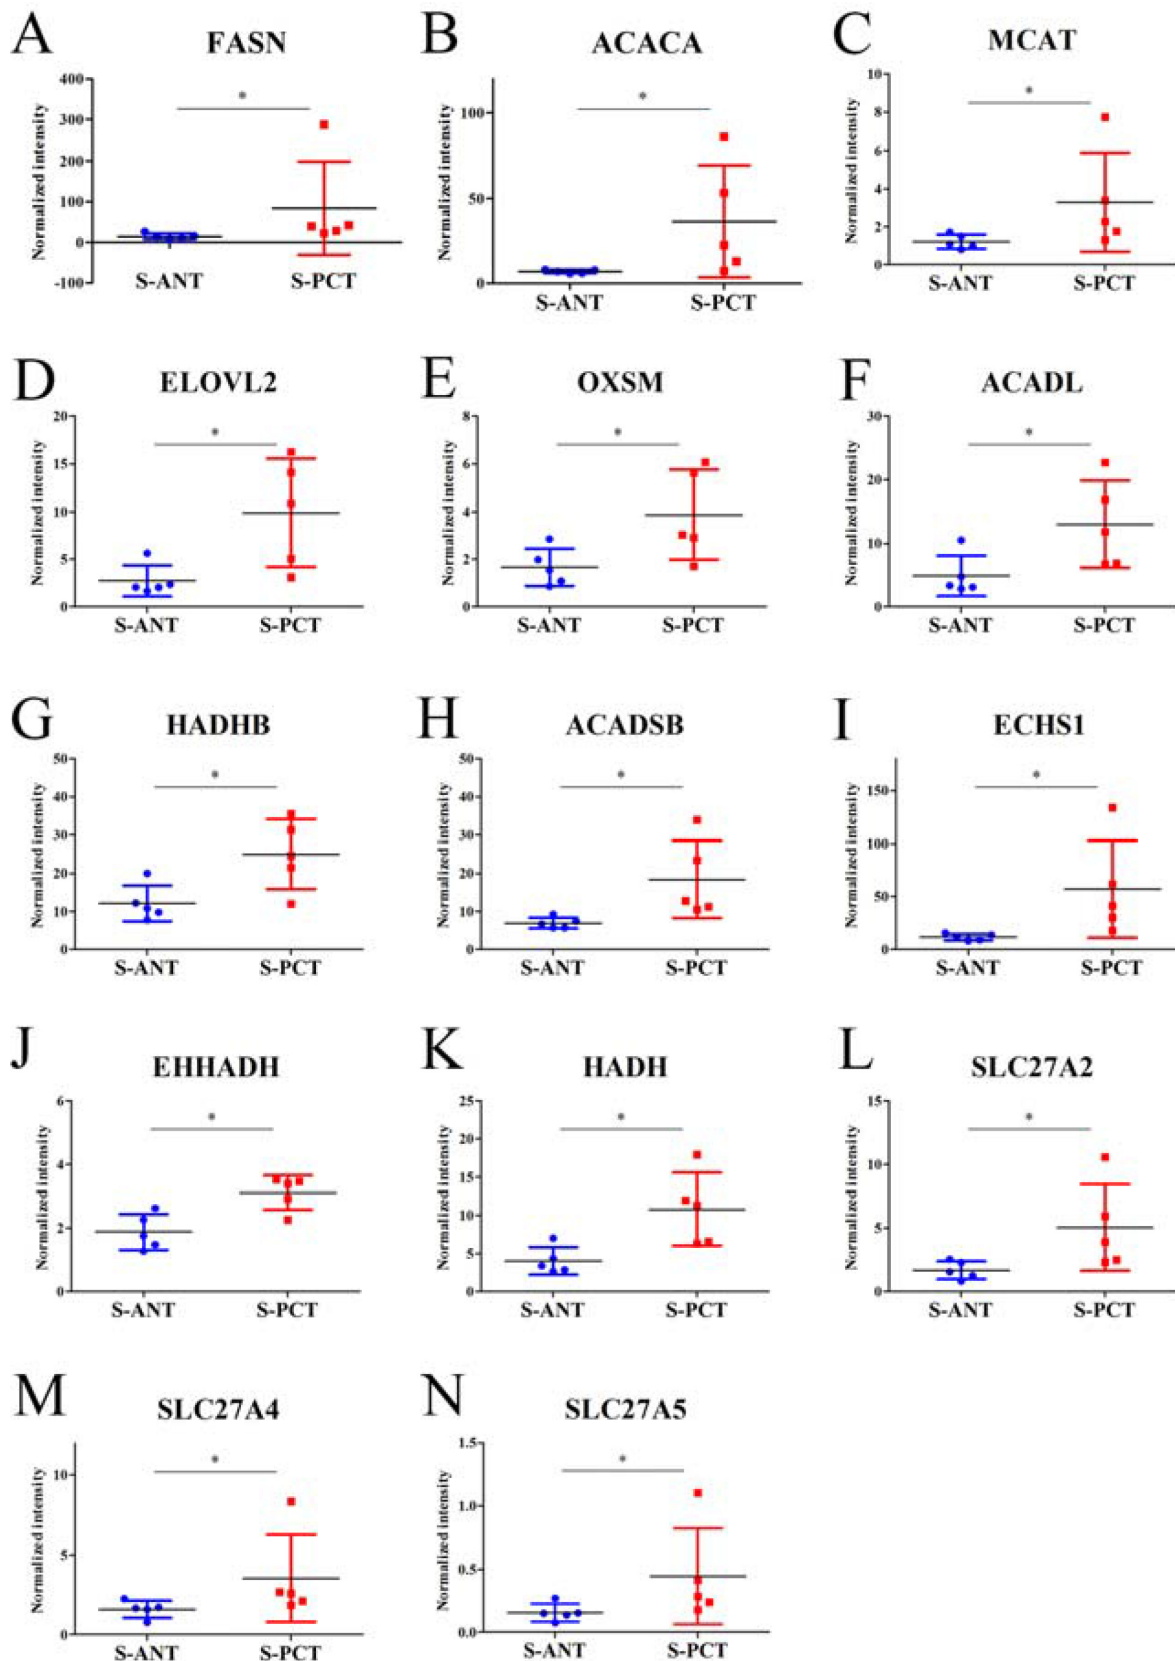

**Supplementary Figure 2: Differentially expressed transcripts between the matched PCT and ANT tissues in fatty acid metabolic pathway in *SPOC*-mutated cohort.** (A) *FASN*, (B) *ACACA*, (C) *MCAT*, (D) *ELOVL2*, (E) *OXSM*, (F) *ACADL*, (G) *HADHB*, (H) *ACADSB*, (I) *ECHS1*, (J) *EHHADH*, (K) *HADH*, (L) *SLC27A2*, (M) *SLC27A4* and (N) *SLC27A5* are shown. \*  $p < 0.05$  compared with the ANT tissues. S-PCT, *SPOC*-mutated PCT tissues; S-ANT, *SPOC*-mutated ANT tissues.

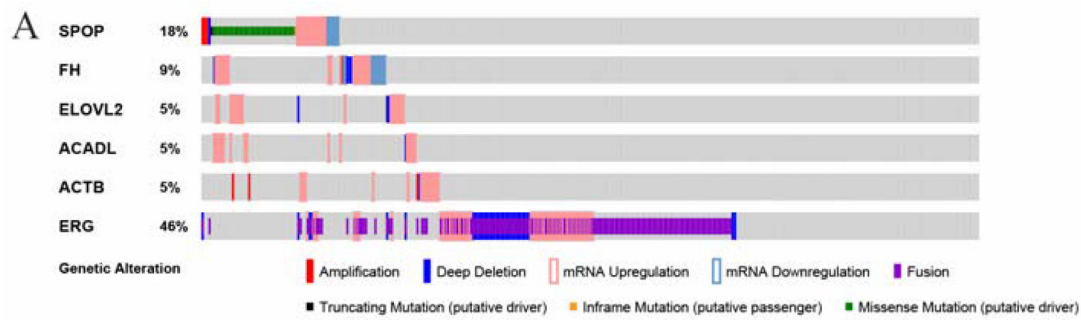

**B**

| Gene A      | Gene B        | p-Value | Log Odds Ratio | Association                                       |
|-------------|---------------|---------|----------------|---------------------------------------------------|
| <i>SPOP</i> | <i>FH</i>     | 0.05    | 0.83           | Tendency towards co-occurrence (Significant)      |
| <i>SPOP</i> | <i>ELOVL2</i> | <0.01   | 1.67           | Tendency towards co-occurrence (Significant)      |
| <i>SPOP</i> | <i>ACADL</i>  | <0.01   | 2.08           | Tendency towards co-occurrence (Significant)      |
| <i>SPOP</i> | <i>ACTB</i>   | 0.16    | 0.70           | Tendency towards co-occurrence                    |
| <i>SPOP</i> | <i>ERG</i>    | <0.01   | -1.56          | Tendency towards mutual exclusivity (Significant) |

**Supplementary Figure 3: The correlations of *SPOP* with *FH*, *ELOVL2*, *ACADL*, *ACTB* and *ERG* in PCa.** (A) Genetic alterations of *SPOP*, *FH*, *ELOVL2*, *ACADL*, *ACTB* and *ERG* genes in PCa patients. (B) The correlations of *SPOP* with *FH*, *ELOVL2*, *ACADL*, *ACTB* and *ERG* in PCa were analyzed by cBioportal.

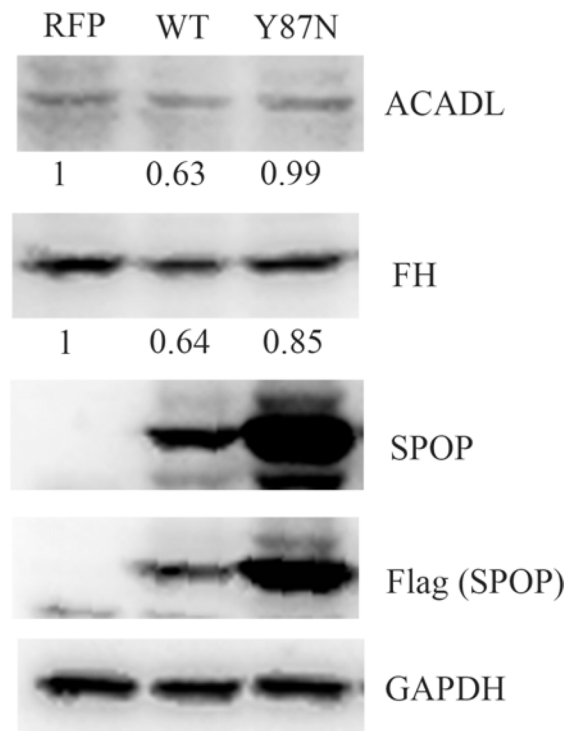

**Supplementary Figure 4: Immunoblotting of ACADL and FH in *SPOP*\_WT and *SPOP*\_Y87N transduced HEK293T cells.** (Con, Control, PLOC.RFP vector; WT, *SPOP*\_WT; Y87N, *SPOP*\_Y87N.).
